# Supplementary material
Source: publisher figshare collection journal article supplement (https://acs.figshare.com/ndownloader/files/4061584)
Supplement: Supplementary file 1 [file 4061584]

---

## Supporting Information

### **Degradation *versus* Expansion of the AgX Frameworks: Formation of Oligomeric and Polymeric Silver Complexes from Reactions of Bulk AgX with N- Bis(diphenylphosphanylmethyl)-2-aminopyridine**

Jü-Hua Yang,<sup>†,‡</sup> Xin-Yi Wu,<sup>†</sup> Run-Tian He,<sup>†</sup> Zhi-Gang Ren,<sup>\*,†,§</sup> Hong-Xi-Li,<sup>†</sup> Hui-Fang Wang,<sup>†</sup> and  
Jian-Ping Lang<sup>\*,†,‡</sup>

<sup>10</sup>

<sup>†</sup> College of Chemistry, Chemical Engineering and Materials Science, Soochow University, Suzhou  
215123, People's Republic of China

<sup>‡</sup> State Key Laboratory of Organometallic Chemistry, Shanghai Institute of Organic Chemistry,  
Chinese Academy of Sciences, Shanghai 200032, People's Republic of China

<sup>15</sup> <sup>§</sup> Institute of Materials Research and Engineering, Agency for Science, Technology and Research, 3  
Research Link, Singapore 117602, Singapore

---

## Contents

|                                                                                                                                                                                                                                                                                                                                                                                                                                                                                                                                                                                                                                                                                                                                                                                                                                                                                                                                                                                                                                                                                          |     |
|------------------------------------------------------------------------------------------------------------------------------------------------------------------------------------------------------------------------------------------------------------------------------------------------------------------------------------------------------------------------------------------------------------------------------------------------------------------------------------------------------------------------------------------------------------------------------------------------------------------------------------------------------------------------------------------------------------------------------------------------------------------------------------------------------------------------------------------------------------------------------------------------------------------------------------------------------------------------------------------------------------------------------------------------------------------------------------------|-----|
| <b>Figures S1.</b> (a) PXRD patterns for <b>1</b> . Simulated (red) and single-phase polycrystalline sample (black) of <b>1</b> . (b) PXRD patterns for <b>2</b> , <b>3</b> and <b>4</b> . Simulated (red) of <b>3</b> , single-phase polycrystalline sample (black) of <b>3</b> , single-phase polycrystalline sample (blue) of <b>2</b> and single-phase polycrystalline sample (pink) of <b>4</b> . (c) PXRD patterns for <b>5</b> . Simulated (red) and single-phase polycrystalline sample (black) of <b>5</b> . (d) PXRD patterns for <b>6</b> ·CH <sub>2</sub> Cl <sub>2</sub> . Simulated (red) and single-phase polycrystalline sample (black) of <b>6</b> ·CH <sub>2</sub> Cl <sub>2</sub> . (e) PXRD patterns for <b>7</b> ·MeCN. Simulated (red) and single-phase polycrystalline sample (black) of <b>7</b> ·MeCN. (f) PXRD patterns for <b>8</b> . Simulated (red) and single-phase polycrystalline sample (black) of <b>8</b> . (g) Observed PXRD patterns for a unknown complex obtained from refluxing a MeCN mixture containing bdppmapy and AgCN (molar ratio = 1:4). | S4  |
| <b>Table S1.</b> The elemental analysis data for compounds <b>2-5</b> derived from reactions of <b>1</b> with NH <sub>4</sub> X (X = Cl, Br, I, SCN) in MeCN. The numbers in parentheses are theoretical values for the C, H, N contents of <b>2-5</b> .                                                                                                                                                                                                                                                                                                                                                                                                                                                                                                                                                                                                                                                                                                                                                                                                                                 | S8  |
| <b>Figure S2.</b> The IR spectra of <b>2</b> (a), <b>3</b> (b), <b>4</b> (c) and <b>5</b> (d) derived from reactions of <b>1</b> with NH <sub>4</sub> X (X = Cl, Br, I, SCN) in MeCN.                                                                                                                                                                                                                                                                                                                                                                                                                                                                                                                                                                                                                                                                                                                                                                                                                                                                                                    | S9  |
| <b>Figure S3.</b> The <sup>1</sup> H NMR spectra of <b>2</b> (a), <b>3</b> (b), <b>4</b> (c) and <b>5</b> (d) derived from reactions of <b>1</b> with NH <sub>4</sub> X (X = Cl, Br, I, SCN) in MeCN.                                                                                                                                                                                                                                                                                                                                                                                                                                                                                                                                                                                                                                                                                                                                                                                                                                                                                    | S11 |
| <b>Figure S4.</b> The PXRD patterns of <b>2</b> (a), <b>3</b> (b), <b>4</b> (c) and <b>5</b> (d) derived from reactions of <b>1</b> with NH <sub>4</sub> X (X = Cl, Br, I, SCN) in MeCN. Simulated (red) and single-phase polycrystalline sample (black).                                                                                                                                                                                                                                                                                                                                                                                                                                                                                                                                                                                                                                                                                                                                                                                                                                | S13 |

---

**Figure S5.** The observed PXRD patterns for the products derived from solid state reactions of **1** with NH<sub>4</sub>Cl (a), NH<sub>4</sub>Br (b), NH<sub>4</sub>I (c) or NH<sub>4</sub>SCN (d).S15

**Figures S6.** (a) The positive-ion ESI-MS of **2**. (b) The positive-ion ESI-MS of **3**. (c) The positive-ion ESI-MS of **4**. (d) The positive-ion ESI-MS of **5**. (e) The positive-ion ESI-MS of **6**. (f) The positive-ion ESI-MS of **7**. (g) The positive-ion ESI-MS of **8**.S17

**Figure S7.** View of a section of the 1D chain extending along the *b* axis in **2**. All hydrogen atoms are omitted for clarity.S21

10

**Figure S8.** View of a section of the 1D chain extending along the *b* axis in **3**. All hydrogen atoms are omitted for clarity.S21

**Figures S9.** The TGA curves of **1-8**.S22

15

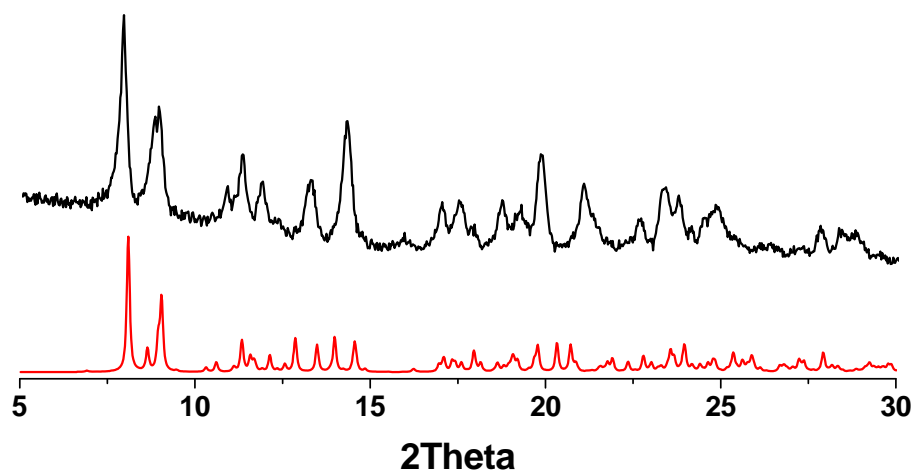

(a)

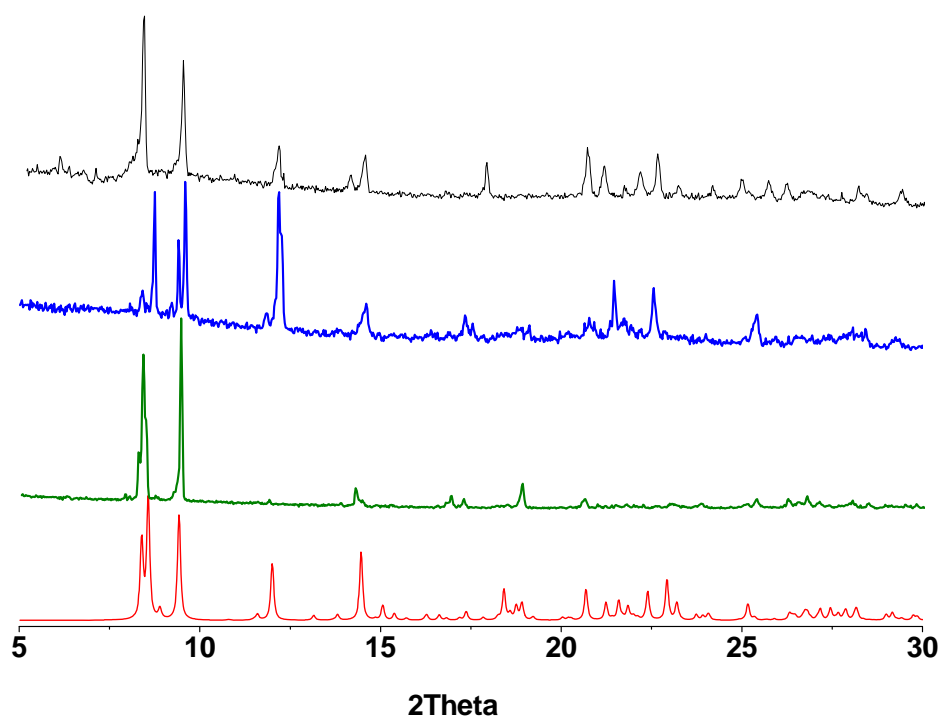

(b)

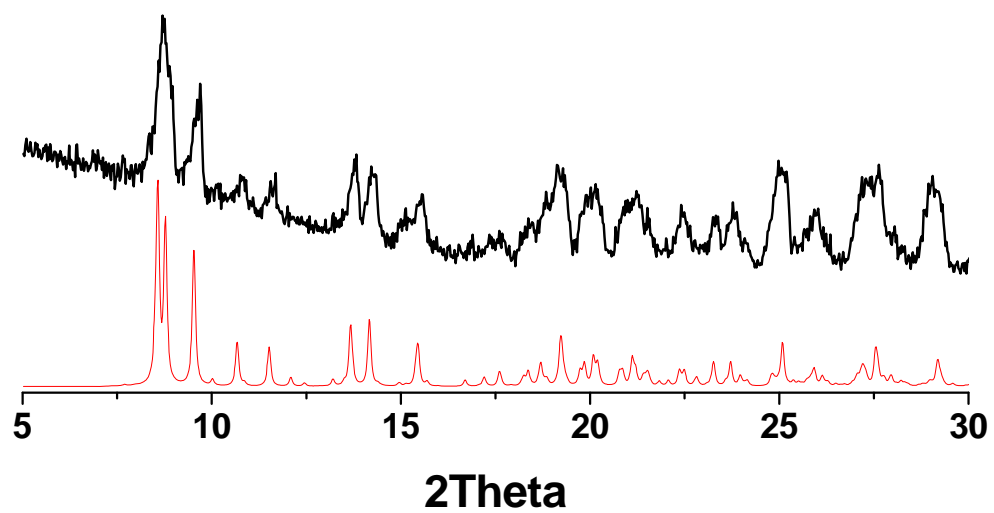

(c)

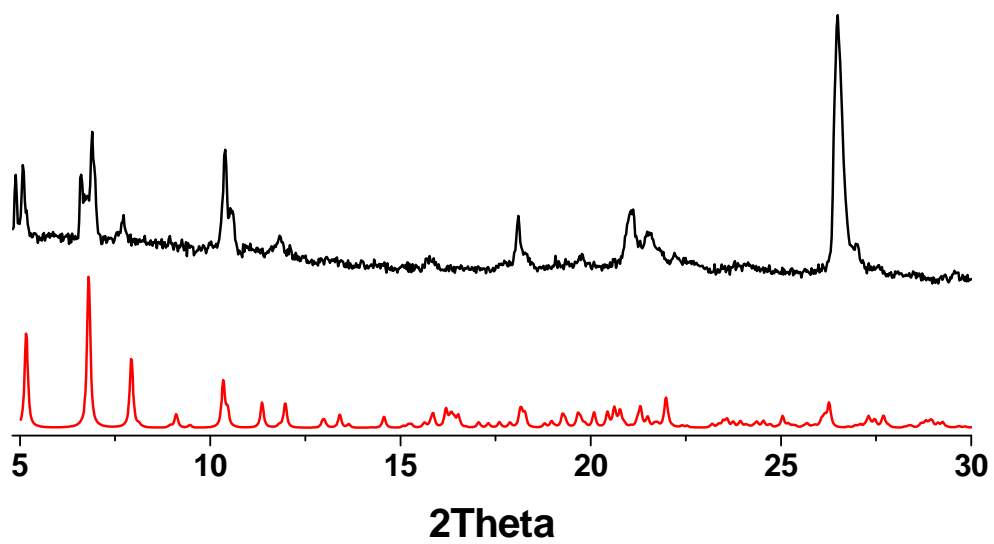

(d)

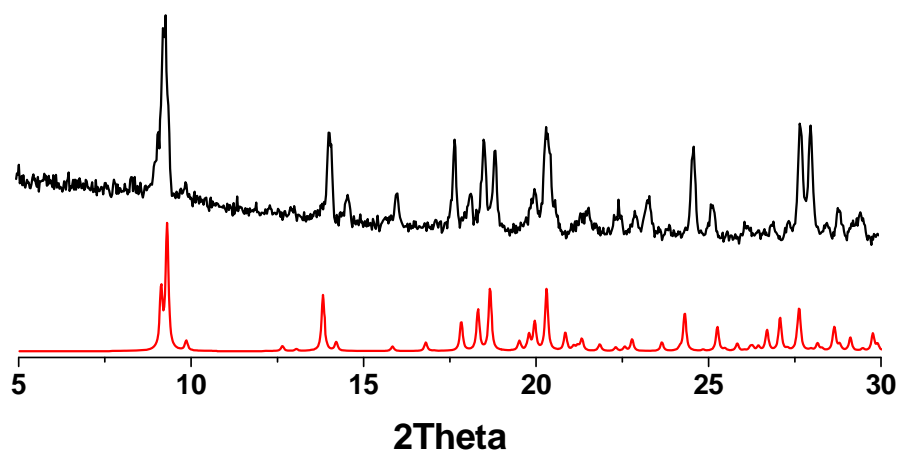

(e)

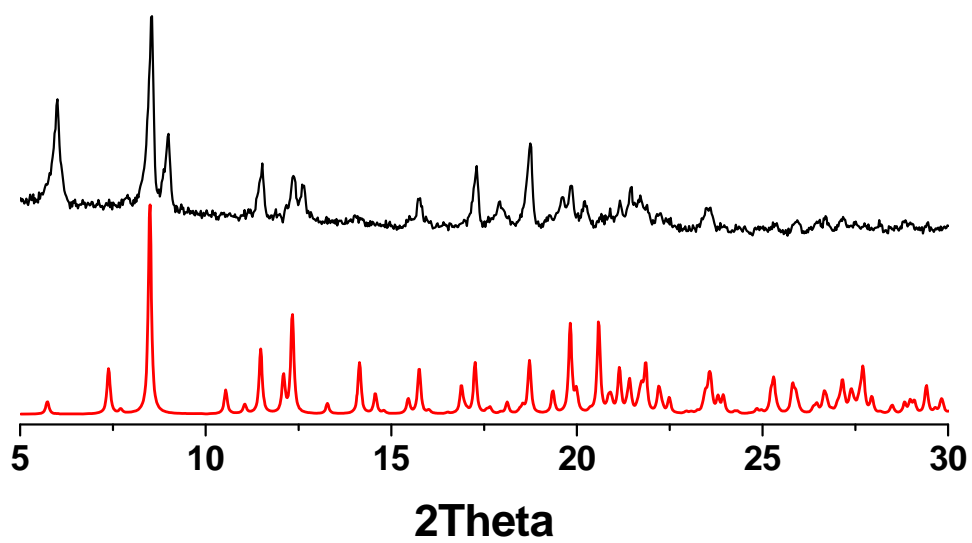

(f)

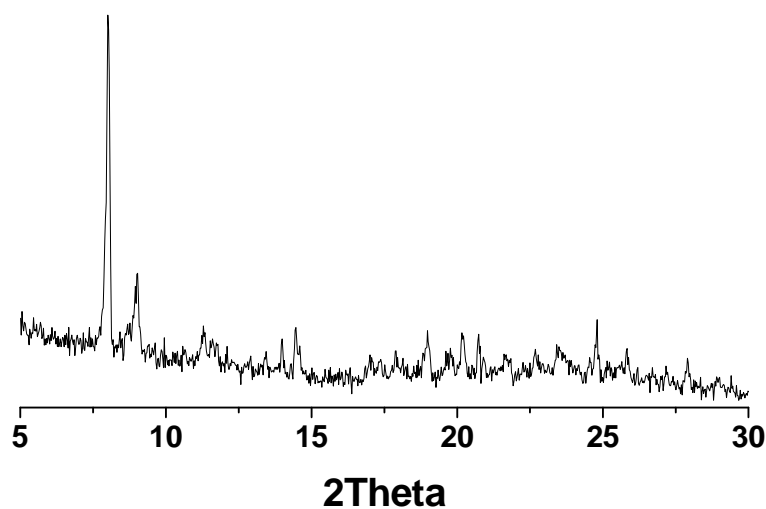

(g)

**Figures S1.** (a) PXRD patterns for **1**. Simulated (red) and single-phase polycrystalline sample (black) of **1**. (b) PXRD patterns for **2**, **3** and **4**. Simulated (red) of **3**, single-phase polycrystalline sample (green) of **3**, single-phase polycrystalline sample (blue) of **2** and single-phase polycrystalline sample (black) of **4**. (c) PXRD patterns for **5**. Simulated (red) and single-phase polycrystalline sample (black) of **5**. (d) PXRD patterns for **6**·CH<sub>2</sub>Cl<sub>2</sub>. Simulated (red) and single-phase polycrystalline sample (black) of **6**·CH<sub>2</sub>Cl<sub>2</sub>. (e) PXRD patterns for **7**·MeCN. Simulated (red) and single-phase polycrystalline sample (black) of **7**·MeCN. (f) PXRD patterns for **8**. Simulated (red) and single-phase polycrystalline sample (black) of **8**. (g) Observed PXRD patterns for a unknown complex obtained from refluxing a MeCN mixture containing bdppmapy and AgCN (molar ratio = 1:4).

---

**Table S1.** The elemental analysis data for compounds **2-5** derived from reactions of **1** with  $\text{NH}_4\text{X}$  ( $\text{X} = \text{Cl, Br, I, SCN}$ ) in MeCN. The numbers in parentheses are theoretical values for the C, H, N contents of **2-5**.

---

| <sup>5</sup>      | C             | H           | N           |
|-------------------|---------------|-------------|-------------|
| Compound <b>2</b> | 58.33 (58.74) | 4.72 (4.45) | 4.73 (4.42) |
| Compound <b>3</b> | 55.19 (54.89) | 3.83 (4.16) | 4.53 (4.13) |
| Compound <b>4</b> | 50.99 (51.37) | 3.72 (3.75) | 4.06 (3.99) |
| Compound <b>5</b> | 58.92 (58.55) | 4.01 (4.30) | 6.89 (6.40) |

---

<sup>10</sup>



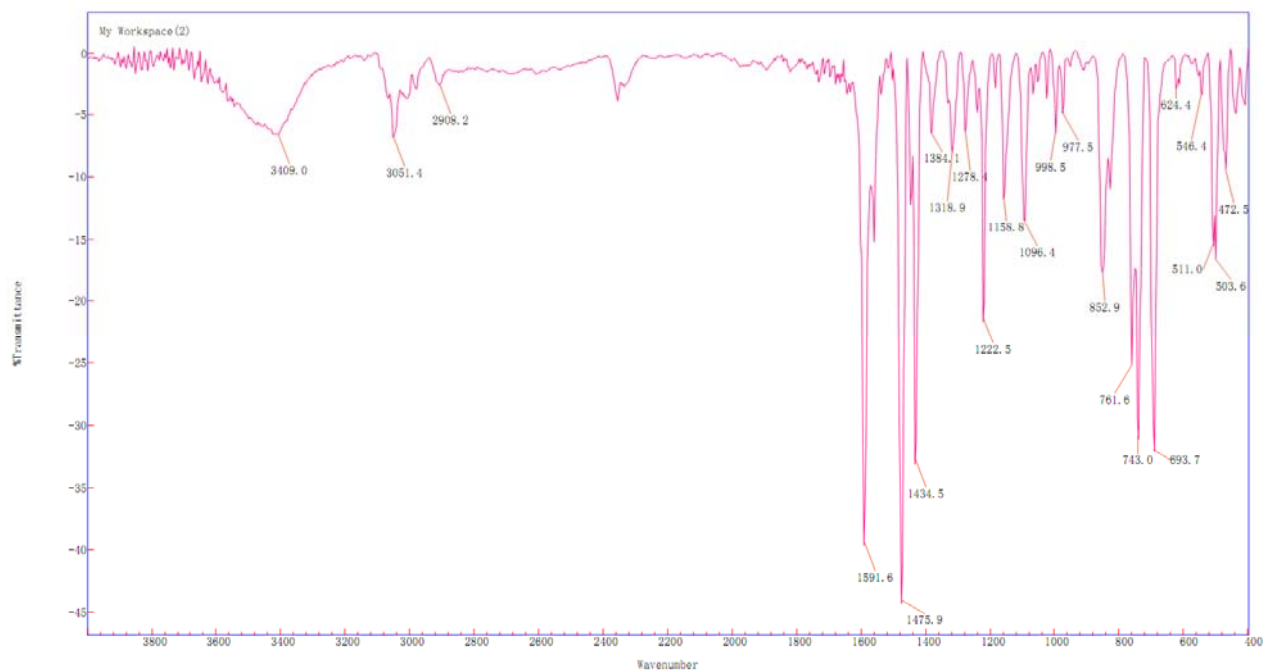

(a)

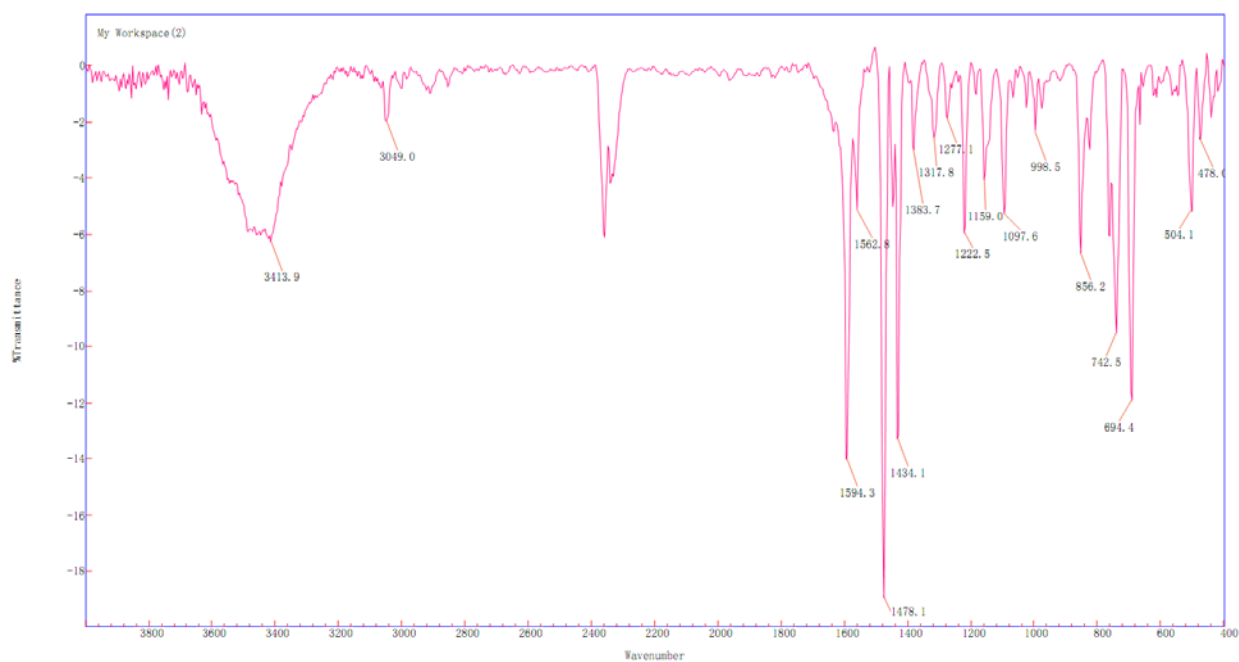

(b)

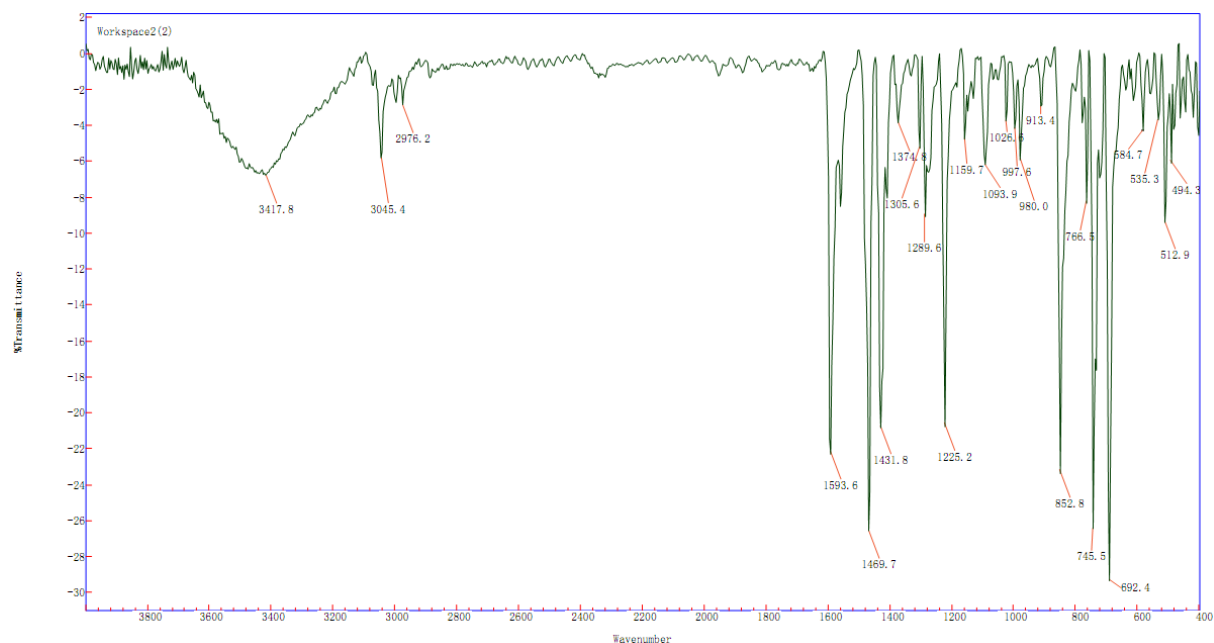

(c)

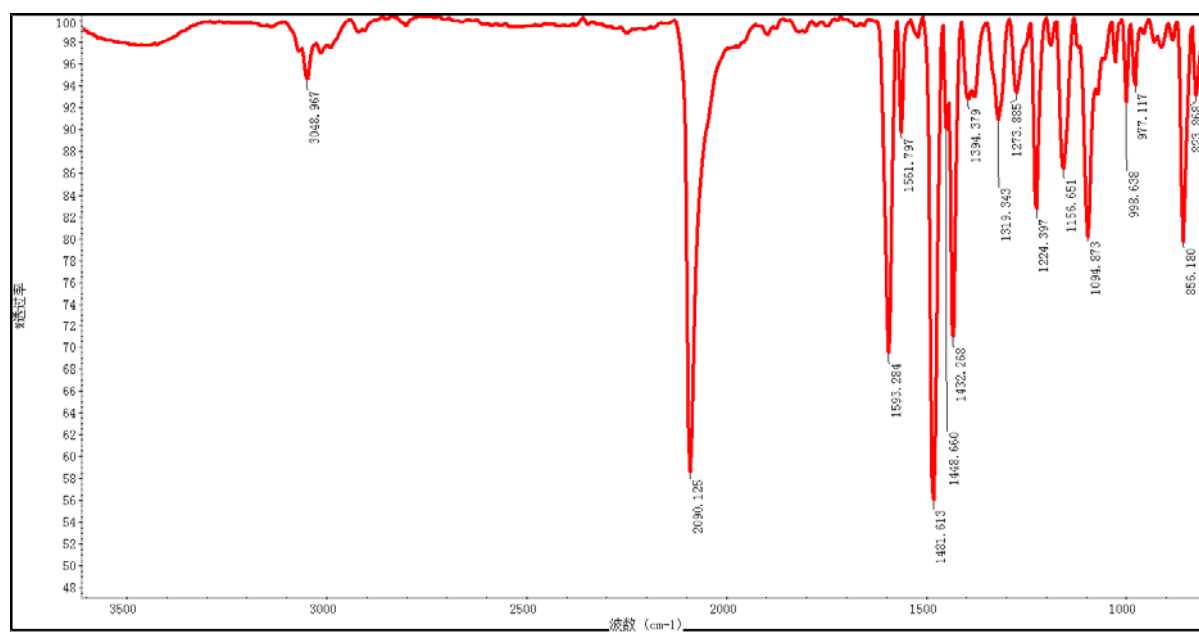

(d)

**Figure S2.** The IR spectra of compounds **2** (a), **3** (b), **4** (c) and **5** (d) derived from reactions of **1** with  $\text{NH}_4\text{X}$  ( $\text{X} = \text{Cl}, \text{Br}, \text{I}, \text{SCN}$ ) in MeCN.

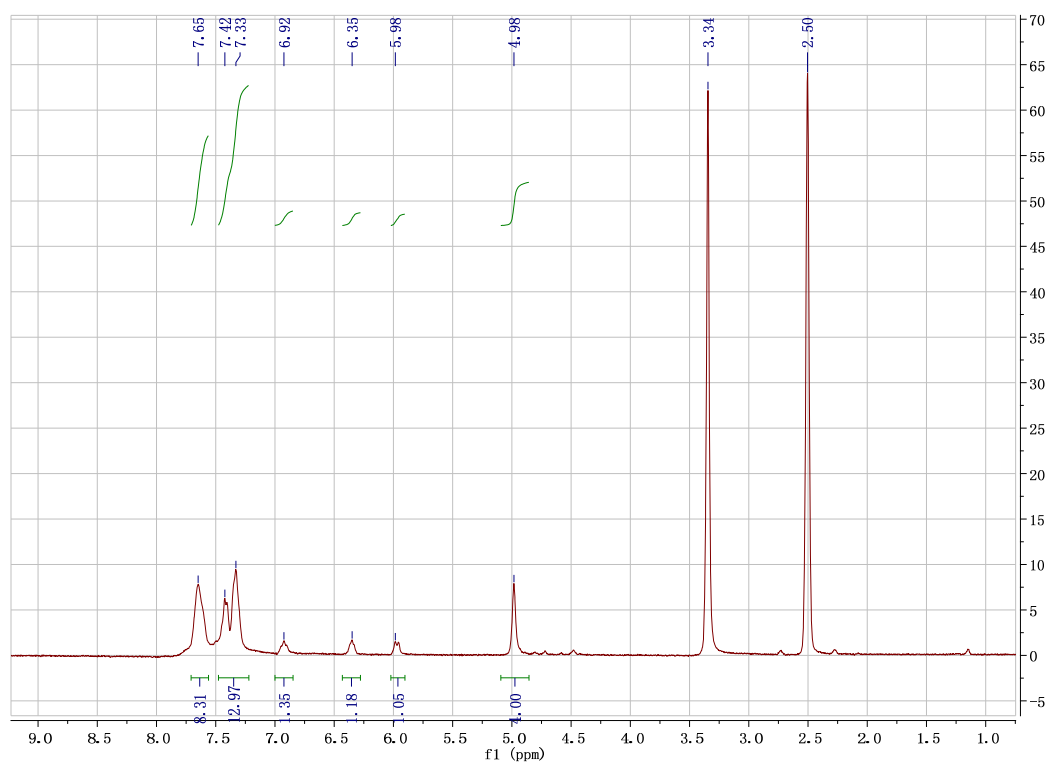

(a)

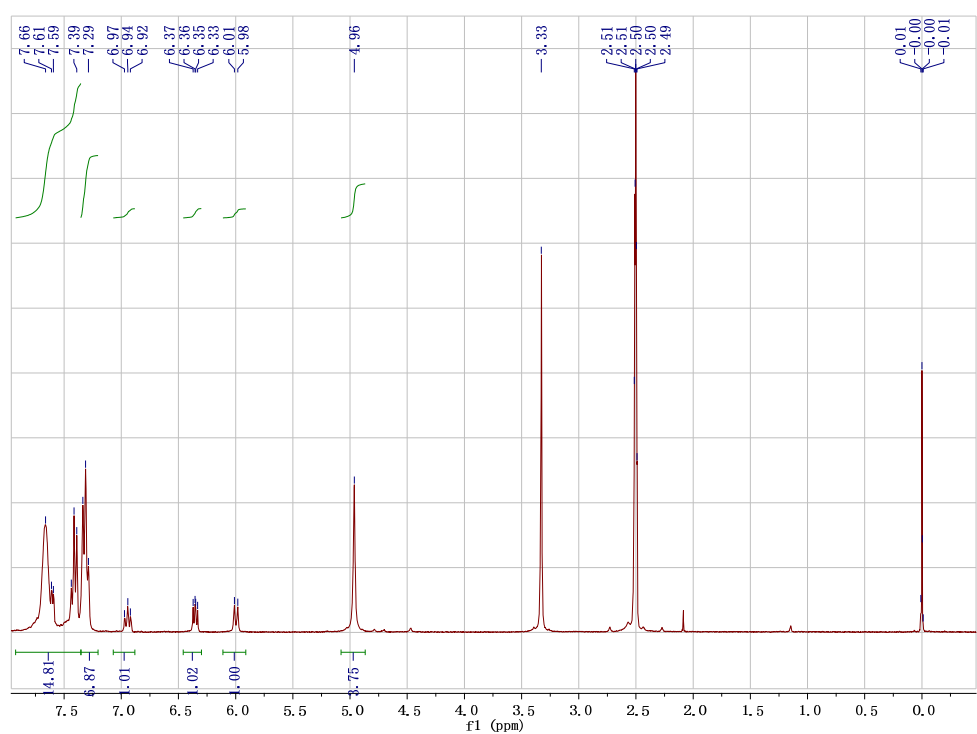

(b)

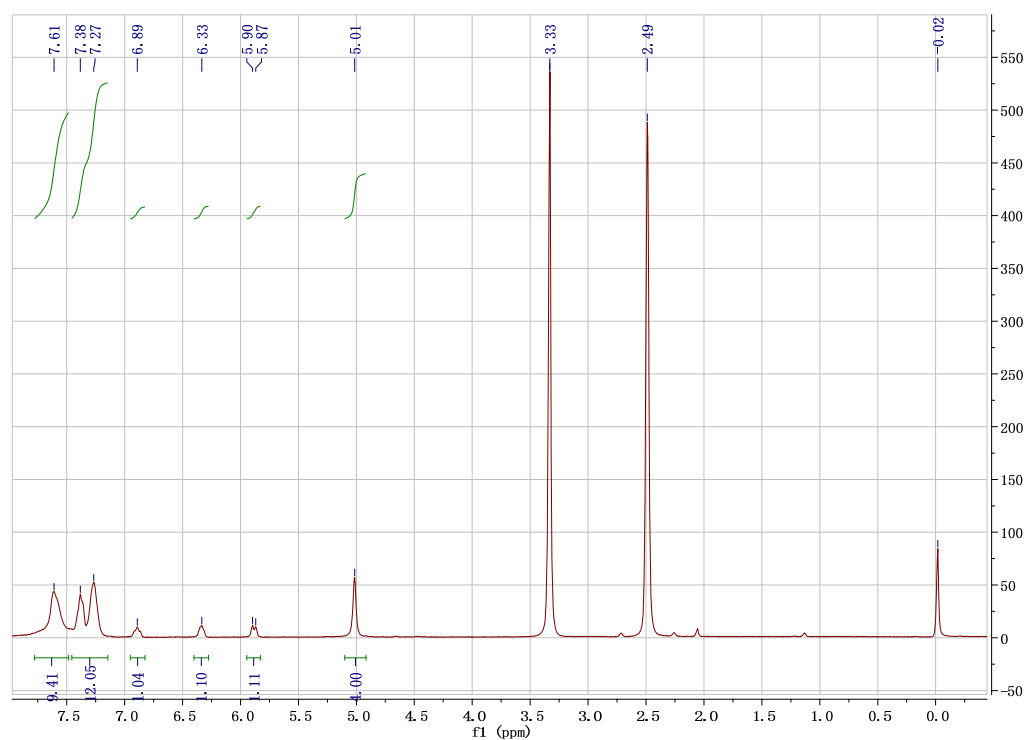

(c)

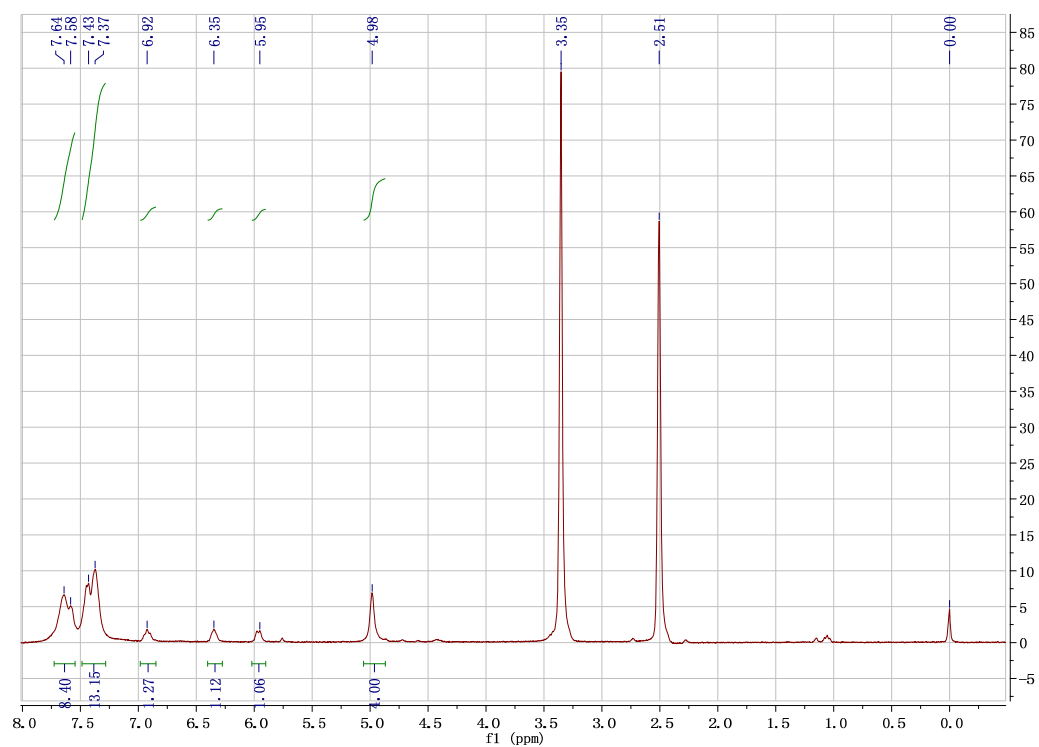

(d)

**Figure S3.** The <sup>1</sup>H NMR spectra of **2** (a), **3** (b), **4** (c) and **5** (d) derived from reactions of **1** with NH<sub>4</sub>X (X = Cl, Br, I, SCN) in MeCN.

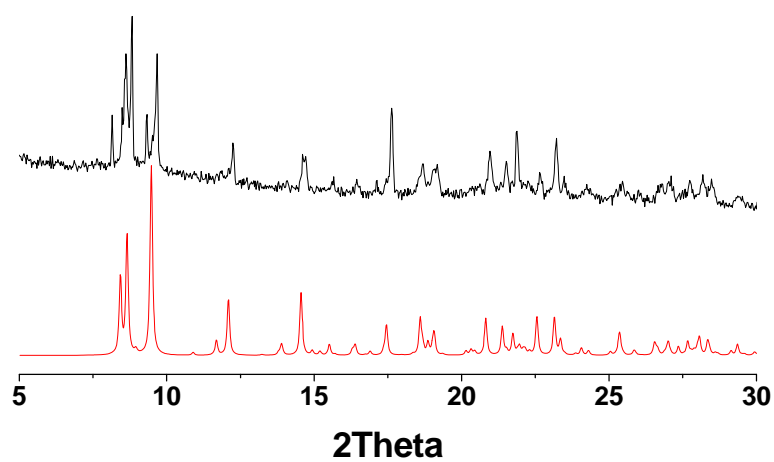

(a)

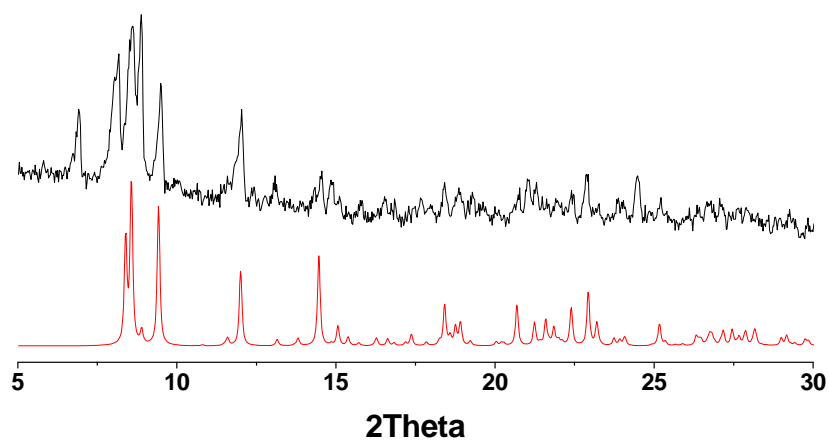

(b)

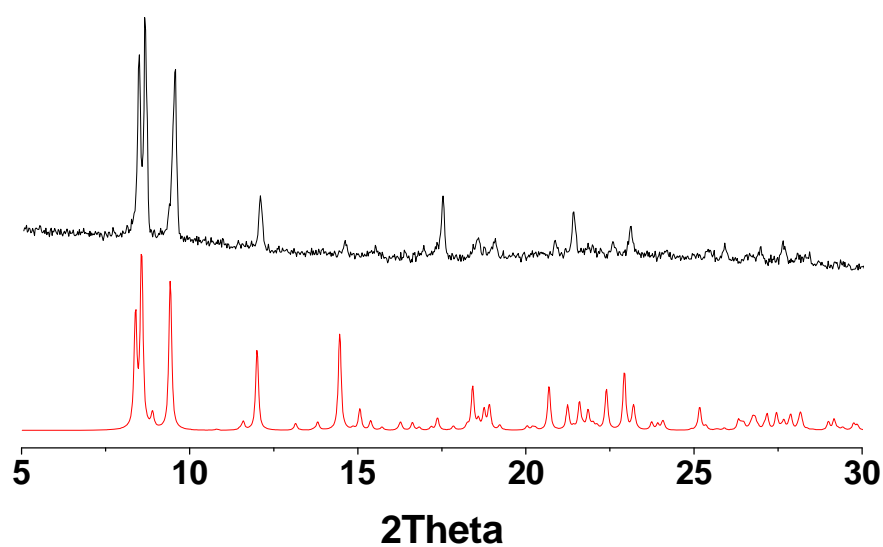

(c)

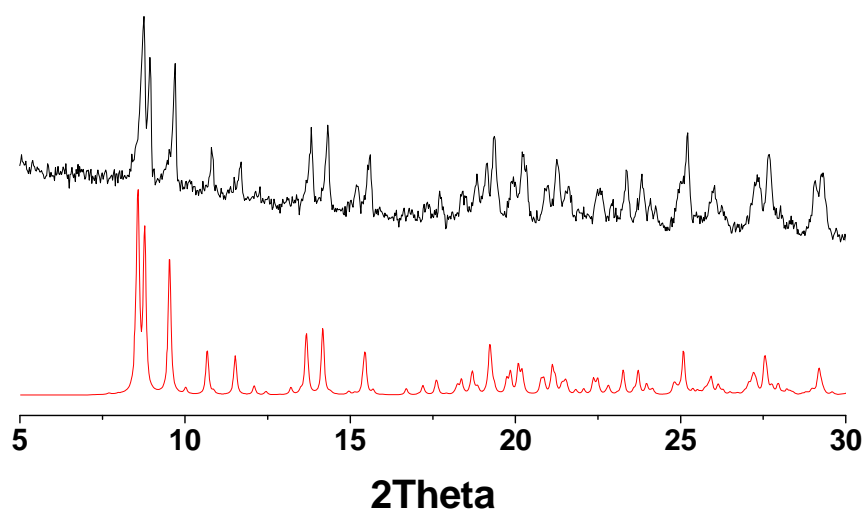

(d)

5

**Figure S4.** The PXRD patterns of **2** (a), **3** (b), **4** (c) and **5** (d) derived from reactions of **1** with  $\text{NH}_4\text{X}$  ( $\text{X} = \text{Cl}, \text{Br}, \text{I}, \text{SCN}$ ) in MeCN. Simulated (red) and single-phase polycrystalline sample (black).

### Solid state reactions of **1** with $\text{NH}_4\text{X}$ ( $\text{X} = \text{Cl}, \text{Br}, \text{I}, \text{SCN}$ ) at room temperature

A mixture of powder **1** (143 mg, 0.1 mmol) and  $\text{NH}_4\text{Cl}$  (11 mg, 0.2 mmol) or  $\text{NH}_4\text{Br}$  (20 mg, 0.2 mmol) or  $\text{NH}_4\text{I}$  (29 mg, 0.2 mmol) or  $\text{NH}_4\text{SCN}$  powder (15 mg, 0.2 mmol) was placed in an agate mortar and ground at room temperature for 25 min. The resulting product was then characterized by powder X-ray diffraction (XPRD) (see below).

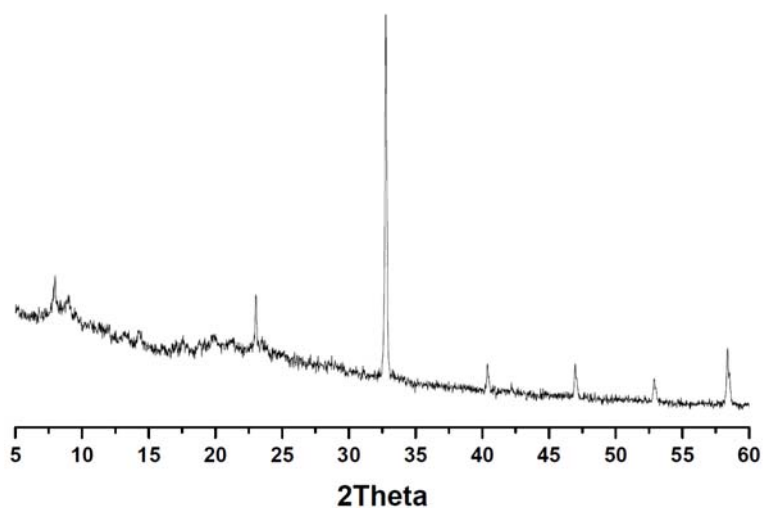

(a)

10

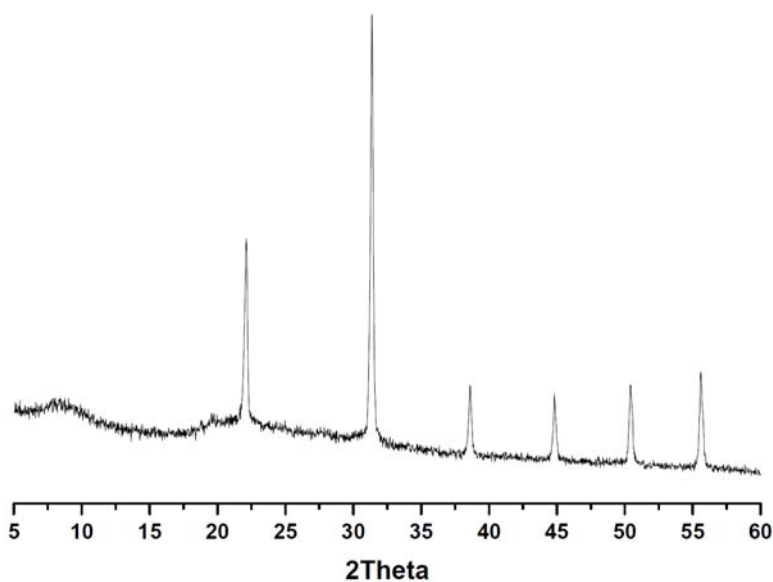

(b)

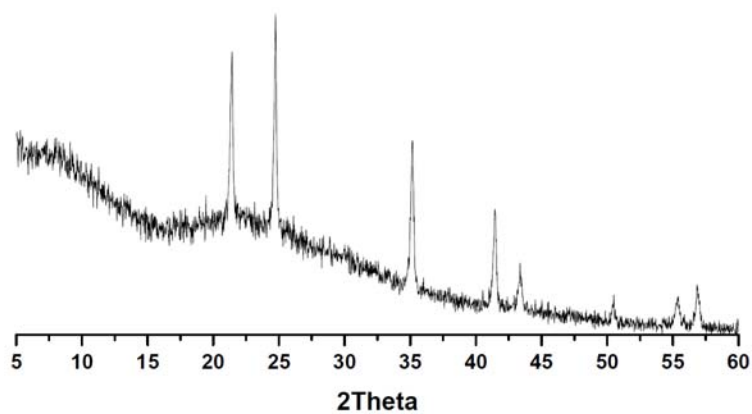

(c)

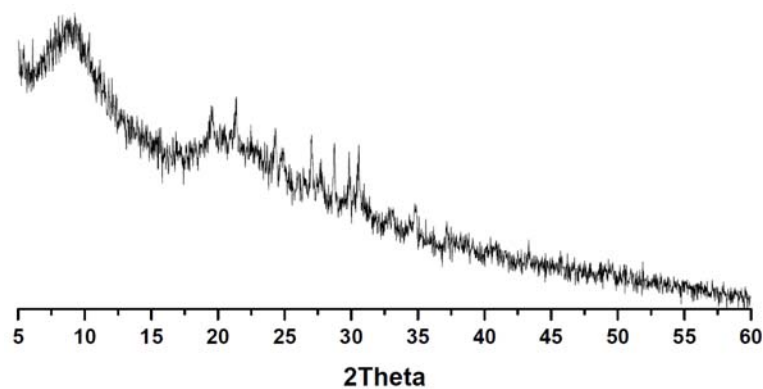

(d)

**Figure S5.** The observed PXRD patterns for the products derived from solid state reactions of **1** with  $\text{NH}_4\text{Cl}$  (a),  $\text{NH}_4\text{Br}$  (b),  $\text{NH}_4\text{I}$  (c) or  $\text{NH}_4\text{SCN}$  (d).



| Sample Name   | yjh-3  | Position    | Vial 1 | Instrument Name | Instrument 1 | User Name              |                |
|---------------|--------|-------------|--------|-----------------|--------------|------------------------|----------------|
| Inj Vol       | -1     | InjPosition |        | SampleType      | Sample       | IRM Calibration Status | Success        |
| Data Filename | AgCl.d | ACQ Method  |        | Comment         |              | Acquired Time          | 2011-6-13 10:1 |

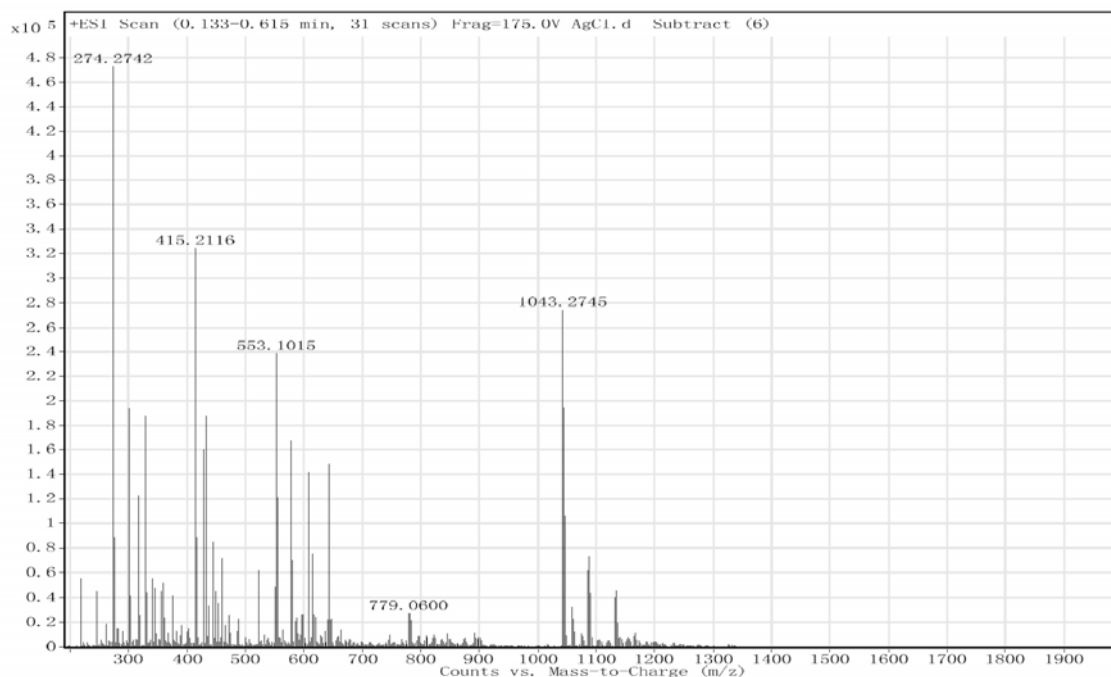

(a)

| Sample Name   | yjh-2  | Position    | Vial 1 | Instrument Name | Instrument 1 | User Name              |                |
|---------------|--------|-------------|--------|-----------------|--------------|------------------------|----------------|
| Inj Vol       | -1     | InjPosition |        | SampleType      | Sample       | IRM Calibration Status | Success        |
| Data Filename | AgBr.d | ACQ Method  |        | Comment         |              | Acquired Time          | 2011-6-13 10:1 |

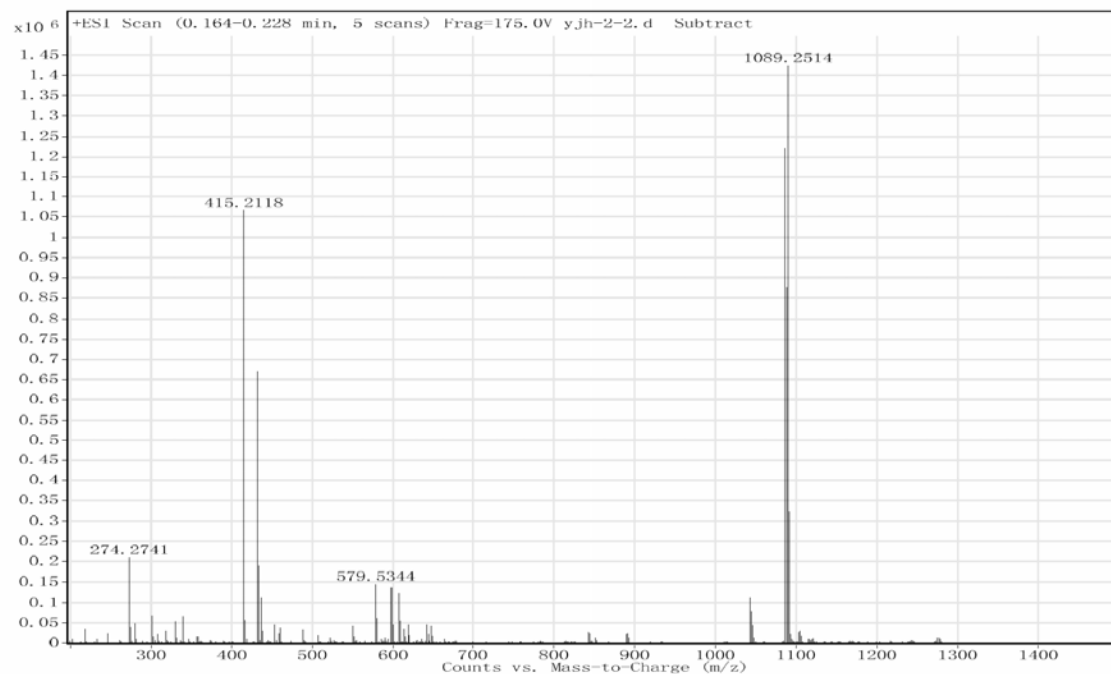

(b)

| Sample Name   | yjh-4 | Position    | Vial 1 | Instrument Name | Instrument 1 | User Name              |                |
|---------------|-------|-------------|--------|-----------------|--------------|------------------------|----------------|
| Inj Vol       | -1    | InjPosition |        | SampleType      | Sample       | IRM Calibration Status | Success        |
| Data Filename | AgI.d | ACQ Method  |        | Comment         |              | Acquired Time          | 2011-6-13 10:2 |

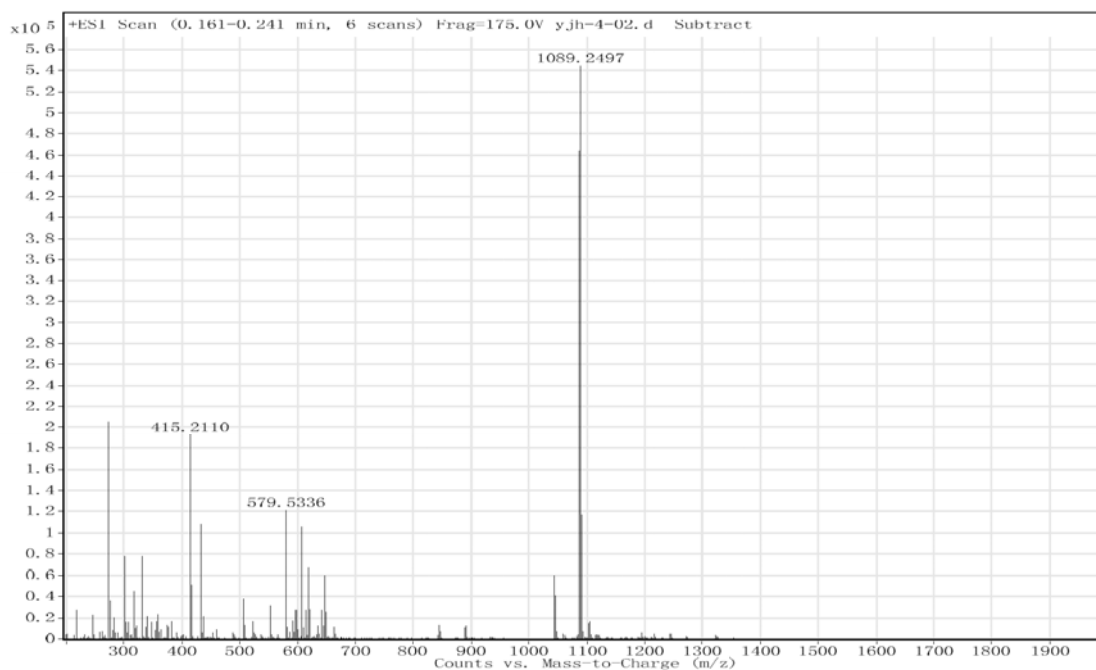

(c)

| Sample Name   | yjh-5   | Position    | Vial 1 | Instrument Name | Instrument 1 | User Name              |                |
|---------------|---------|-------------|--------|-----------------|--------------|------------------------|----------------|
| Inj Vol       | -1      | InjPosition |        | SampleType      | Sample       | IRM Calibration Status | Success        |
| Data Filename | AgSCN.d | ACQ Method  |        | Comment         |              | Acquired Time          | 2011-6-13 10:3 |

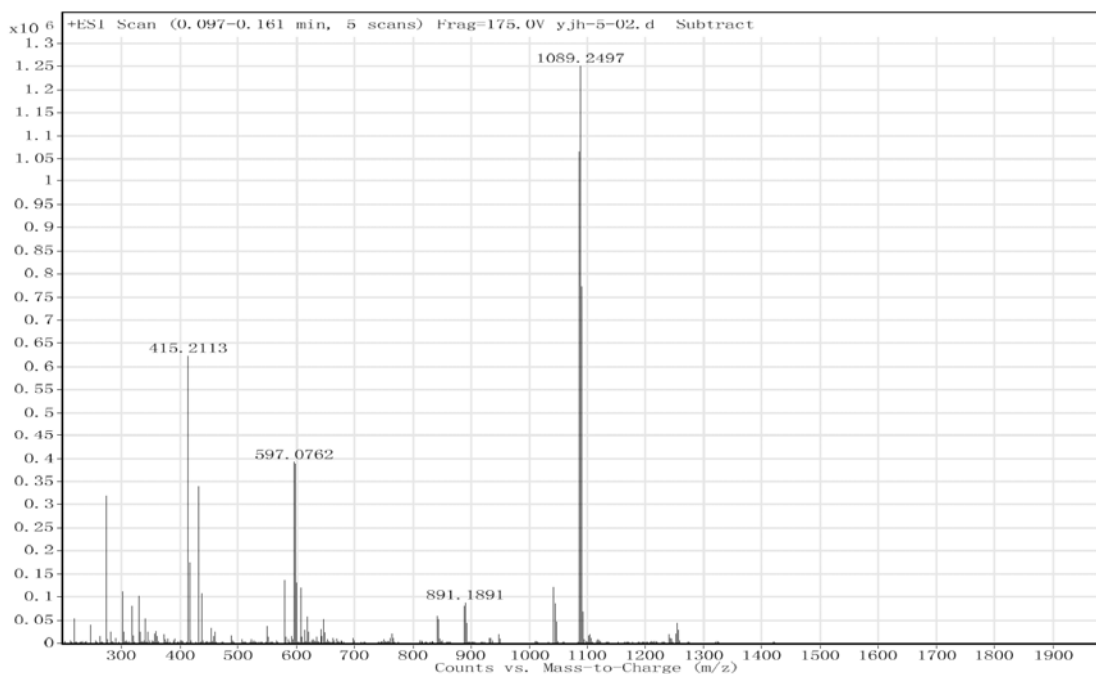

(d)

|                      |                |                    |        |                        |              |                               |                |
|----------------------|----------------|--------------------|--------|------------------------|--------------|-------------------------------|----------------|
| <b>Sample Name</b>   | yang-agcn      | <b>Position</b>    | Vial 1 | <b>Instrument Name</b> | Instrument 1 | <b>User Name</b>              |                |
| <b>Inj Vol</b>       | 0              | <b>InjPosition</b> |        | <b>SampleType</b>      | Sample       | <b>IRM Calibration Status</b> | Success        |
| <b>Data Filename</b> | yang-agcn-01.d | <b>ACQ Method</b>  |        | <b>Comment</b>         |              | <b>Acquired Time</b>          | 2012-5-30 10:3 |

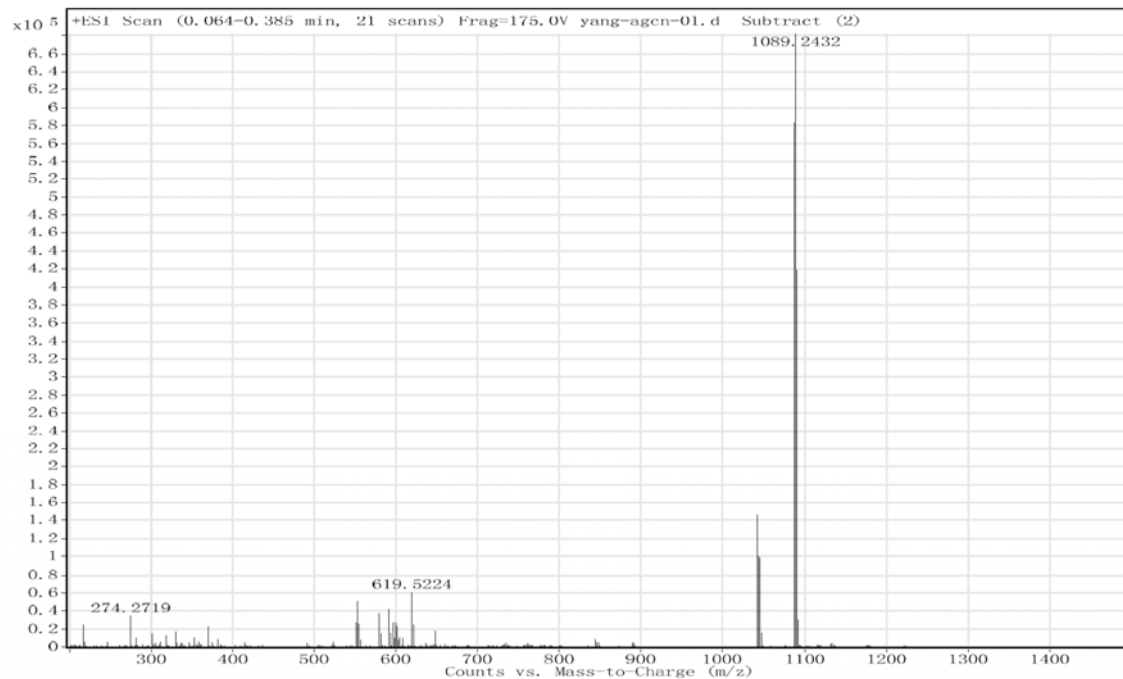

(e)

|                      |            |                    |        |                        |              |                               |                |
|----------------------|------------|--------------------|--------|------------------------|--------------|-------------------------------|----------------|
| <b>Sample Name</b>   | YJH-1      | <b>Position</b>    | Vial 1 | <b>Instrument Name</b> | Instrument 1 | <b>User Name</b>              |                |
| <b>Inj Vol</b>       | 0          | <b>InjPosition</b> |        | <b>SampleType</b>      | Sample       | <b>IRM Calibration Status</b> | Success        |
| <b>Data Filename</b> | yjh-1-01.d | <b>ACQ Method</b>  |        | <b>Comment</b>         |              | <b>Acquired Time</b>          | 2012-9-18 15:5 |

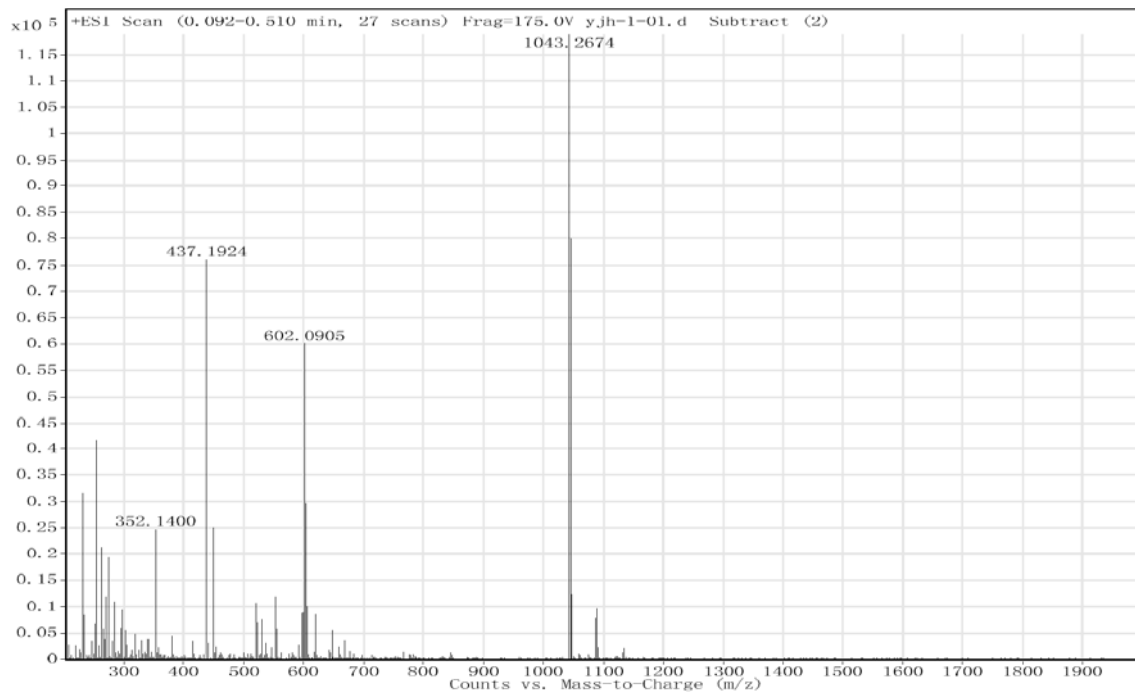

(f)

|               |            |             |        |                 |              |                        |                |
|---------------|------------|-------------|--------|-----------------|--------------|------------------------|----------------|
| Sample Name   | YJH-2      | Position    | Vial 1 | Instrument Name | Instrument 1 | User Name              |                |
| Inj Vol       | 0          | InjPosition |        | SampleType      | Sample       | IRM Calibration Status | Success        |
| Data Filename | yjh-2-02.d | ACQ Method  |        | Comment         |              | Acquired Time          | 2012-9-18 16:0 |

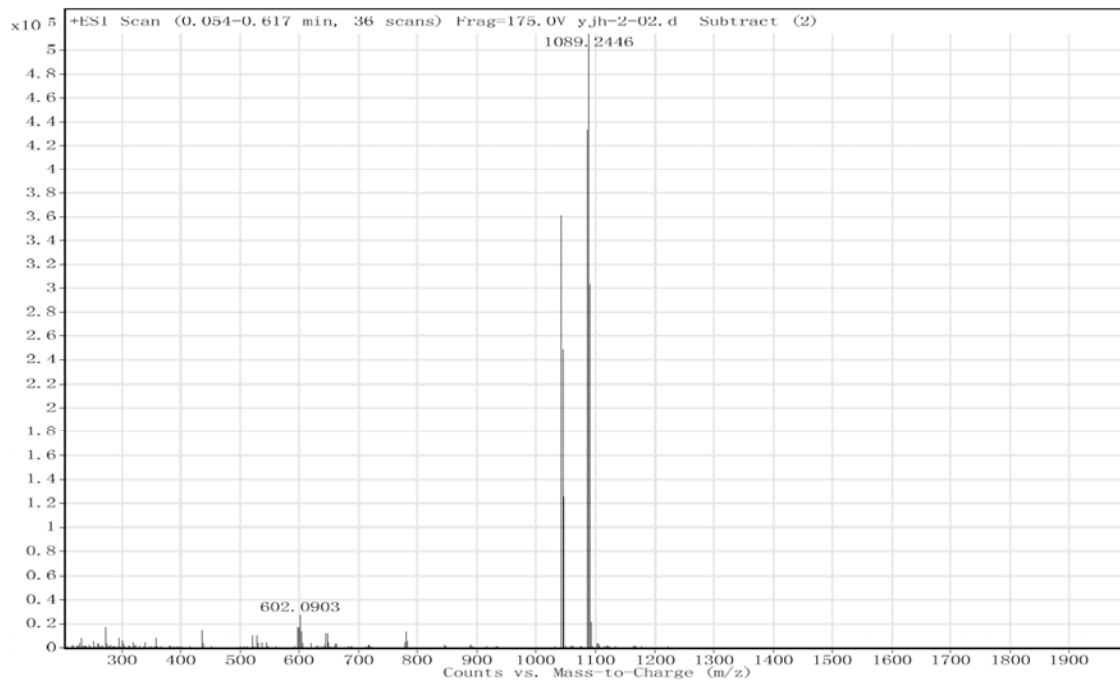

(g)

5

**Figures S6.** (a) The positive-ion ESI-MS of **2**. (b) The positive-ion ESI-MS of **3**. (c) The positive-ion ESI-MS of **4**. (d) The positive-ion ESI-MS of **5**. (e) The positive-ion ESI-MS of **6**. (f) The positive-ion ESI-MS of **7**. (g) The positive-ion ESI-MS of **8**.

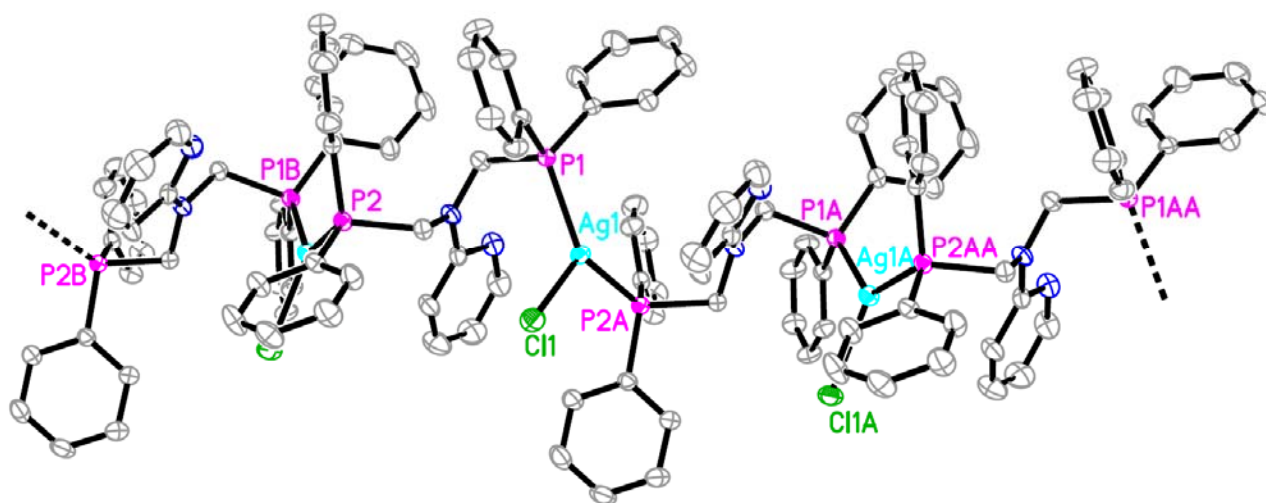

**Figure S7.** View of a section of the 1D chain extending along the *b* axis in **2**. All H atoms are omitted for clarity. Symmetry transformations used to generate equivalent atoms: A:  $1/2 - x, 1/2 + y, z$ .

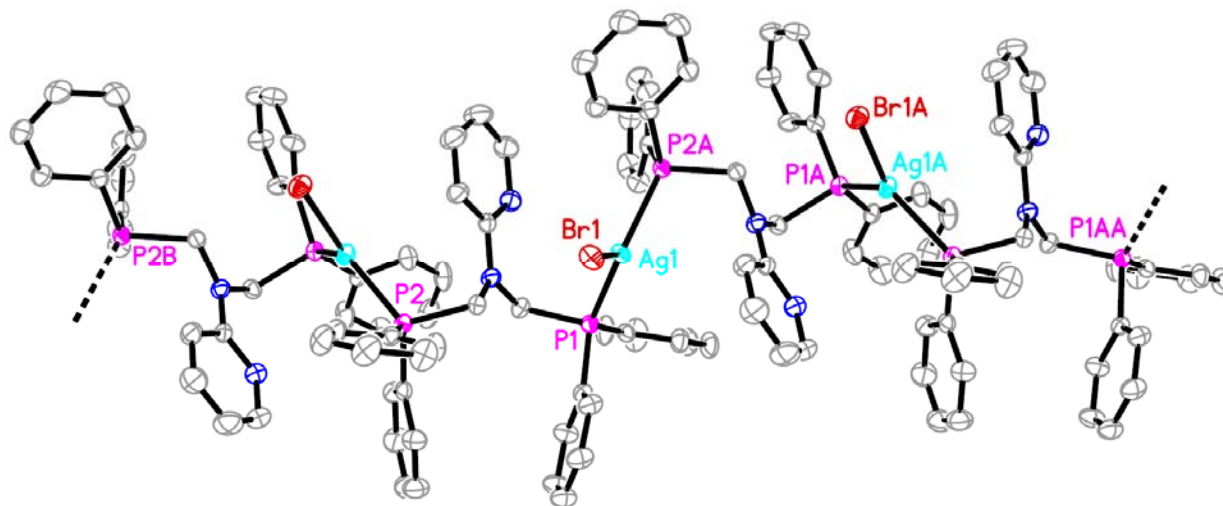

**Figure S8.** View of a section of the 1D chain extending along the *b* axis in **3**. All H atoms are omitted for clarity. Symmetry transformations used to generate equivalent atoms: A:  $1/2 - x, 1/2 + y, z$ .

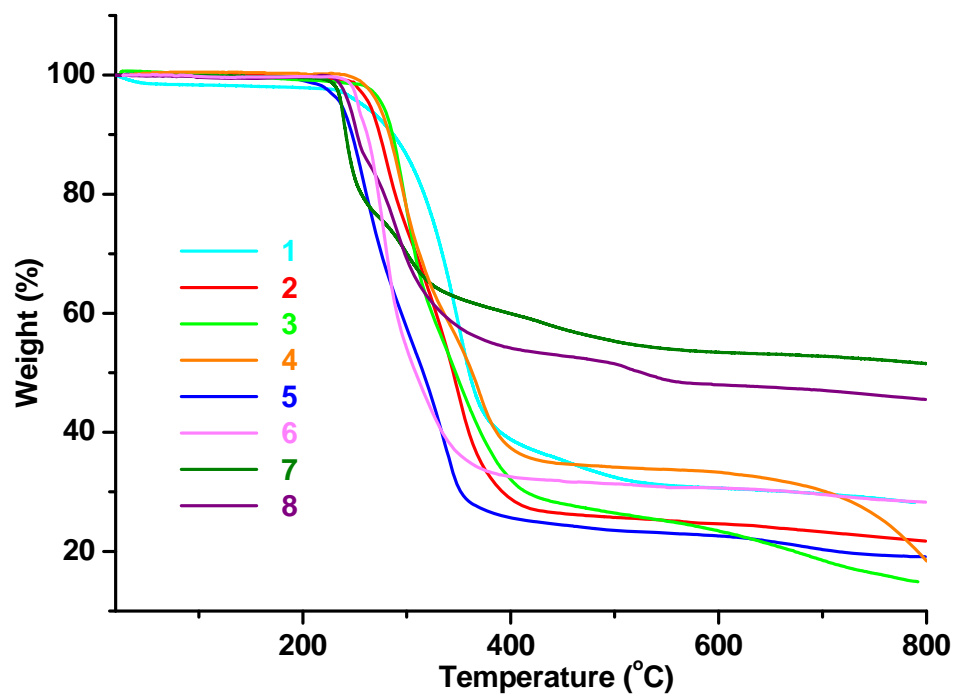

**Figures S9.** The TGA curves for compounds **1-8**.
